# Supplementary material for: Microwave assisted extraction of betulin from birch outer bark
Source: Royal Society of Chemistry journal article supplement (doi:10.1039/c3ra43868f), 2013-01-01
Supplement: c3ra43868f.pdf [file c3ra43868f.pdf]

## Electronic Supplementary Information

### Microwave Assisted Extraction of betulin from birch outer bark

Rui Ferreira,<sup>†,a</sup> Helga Garcia,<sup>†,a</sup> Andreia F. Sousa,<sup>b,c</sup> Carmen S. R. Freire,<sup>b</sup> Armando J. D. Silvestre,<sup>b</sup> Werner Kunz,<sup>d</sup> Luís Paulo N. Rebelo<sup>a</sup> and Cristina Silva Pereira<sup>a\*</sup>

<sup>a</sup>Instituto de Tecnologia Química e Biológica, Universidade Nova de Lisboa, Apartado 127, 2781-901, Oeiras, Portugal (URL: <http://www.itqb.unl.pt>)

<sup>b</sup>CICECO and Department of Chemistry, University of Aveiro, Campus de Santiago, 3810-193 Aveiro, Portugal

<sup>c</sup>Department of Chemical Engineering, University of Coimbra, Pólo II, Pinhal de Marrocos, 3030-290 Coimbra, Portugal

<sup>d</sup>Institute of Physical and Theoretical Chemistry, University of Regensburg, D-93040 Regensburg, Germany

<sup>†</sup>Equally contributing authors; \*corresponding author: [spereira@itqb.unl.pt](mailto:spereira@itqb.unl.pt)

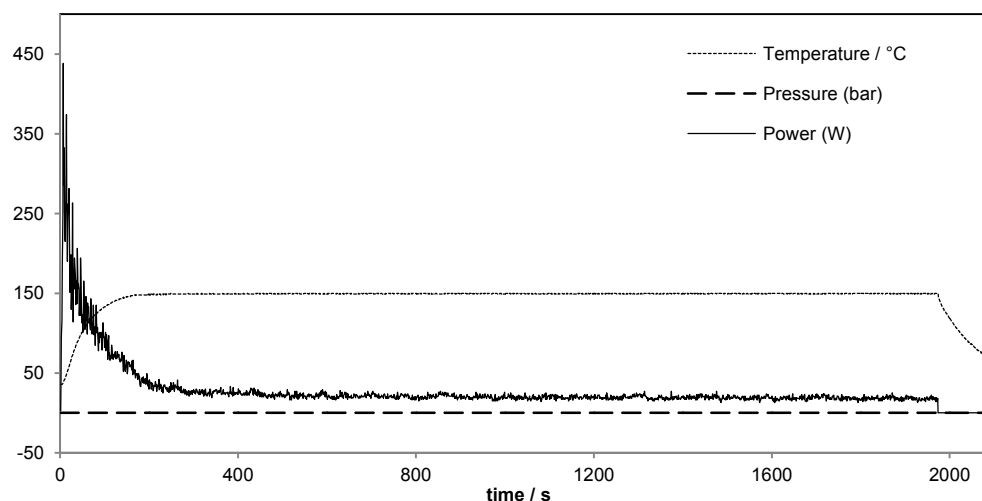

**Fig. ESI1** - Temperature, pressure and power profiles of a microwave assisted extraction with limonene.

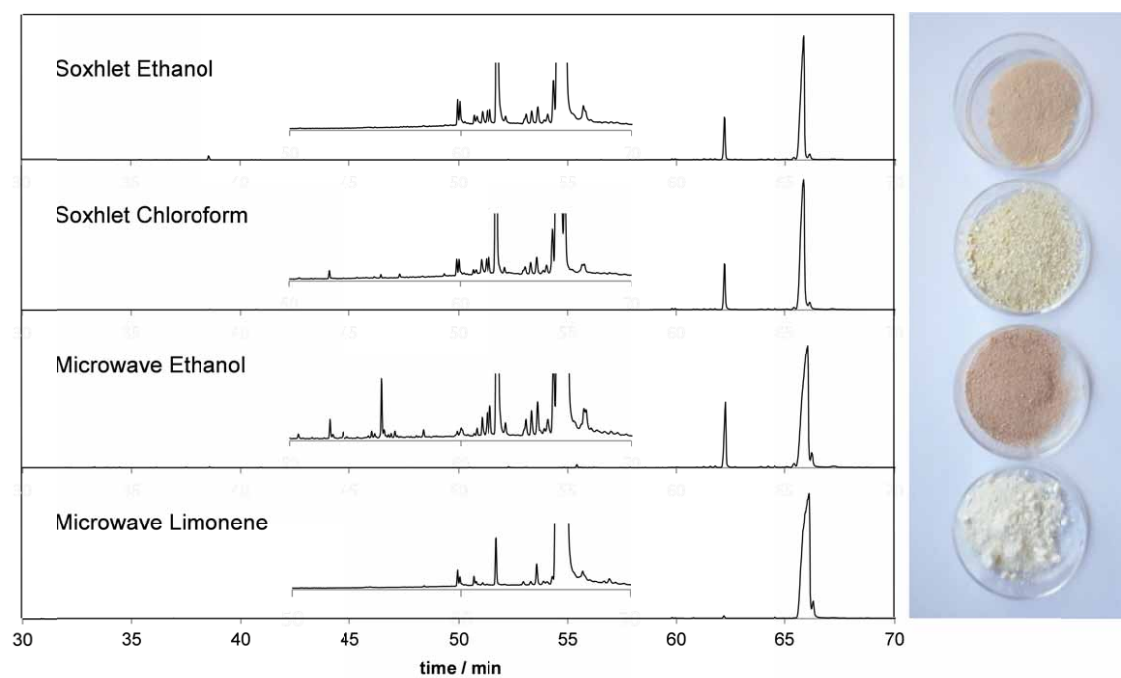

**Fig. ESI2-** GC-MS chromatograms of the betulin extracts. The amplification shows in more detail the chromatograms between 50 and 70 min. Intensities were normalized in relation to the internal standard peak (n-hexadecane, retention time = 27.4 min).

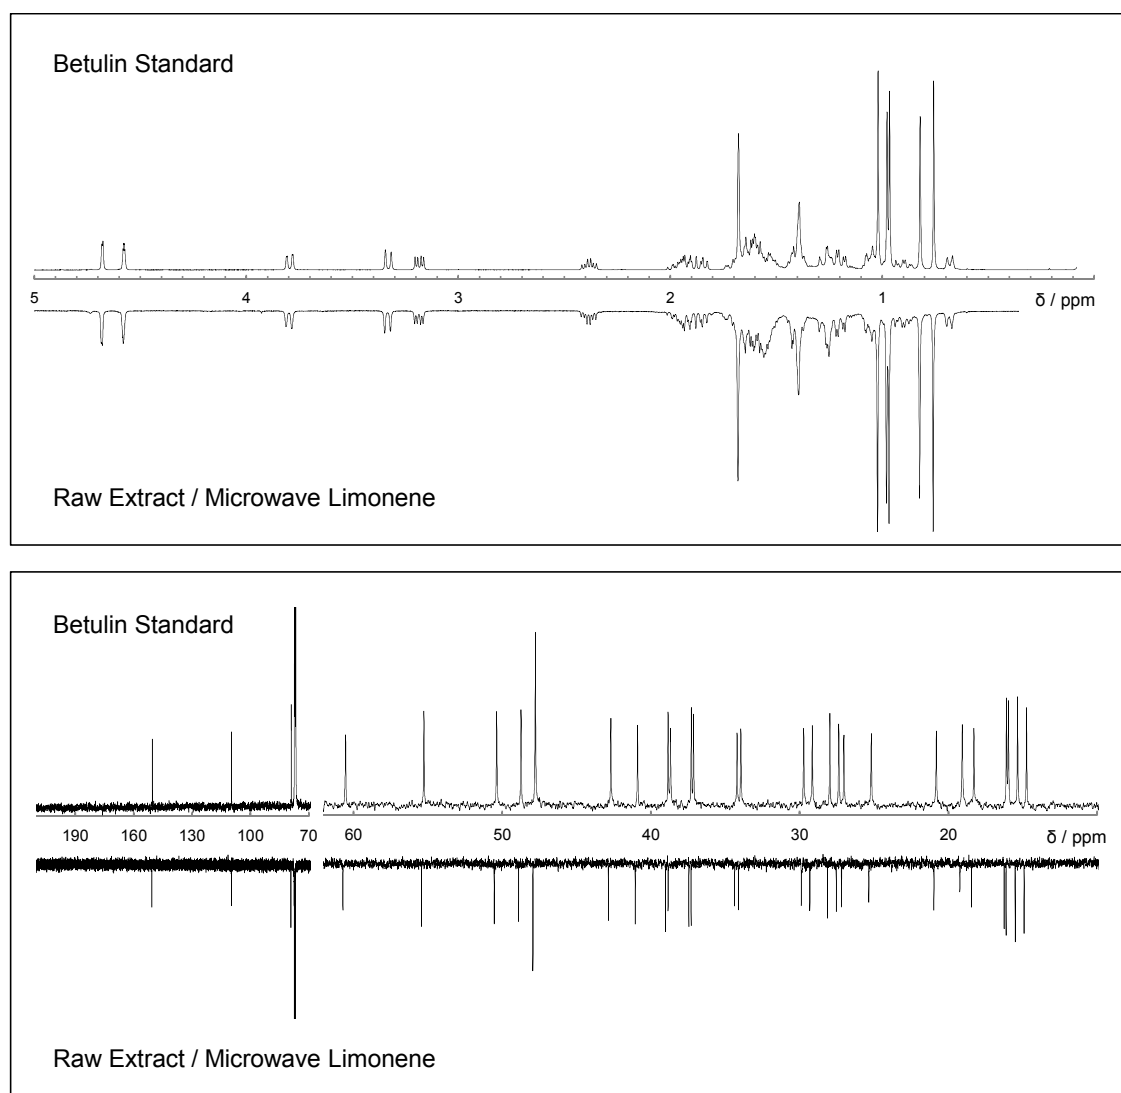

**Fig. ESI3** -  $^1\text{H}$ - (top) and  $^{13}\text{C}$ -NMR (bottom) spectra of betulin standard compared to those of betulin raw extracts obtained with limonene through microwave assisted extraction.
